# Supplementary material for: Albumin as a prospective carrier of the nitrosyl iron complex with thiourea and thiosulfate ligands under aerobic conditions
Source: Royal Society of Chemistry journal article supplement (doi:10.1039/d2dt00291d), 2022-01-01
Supplement: d2dt00291d1.pdf [file d2dt00291d1.pdf]

Supplementary materials to

Albumin as prospective carrier of nitrosyl iron complex with thiourea and thiosulfate ligands under aerobic conditions

Olesya V. Pokidova, Nina S. Emel'yanova, Alexandra Yu. Kormukhina, Veronika O. Novikova,  
Alexander V. Kulikov, Alexander I. Kotelnikov and Natalia A. Sanina

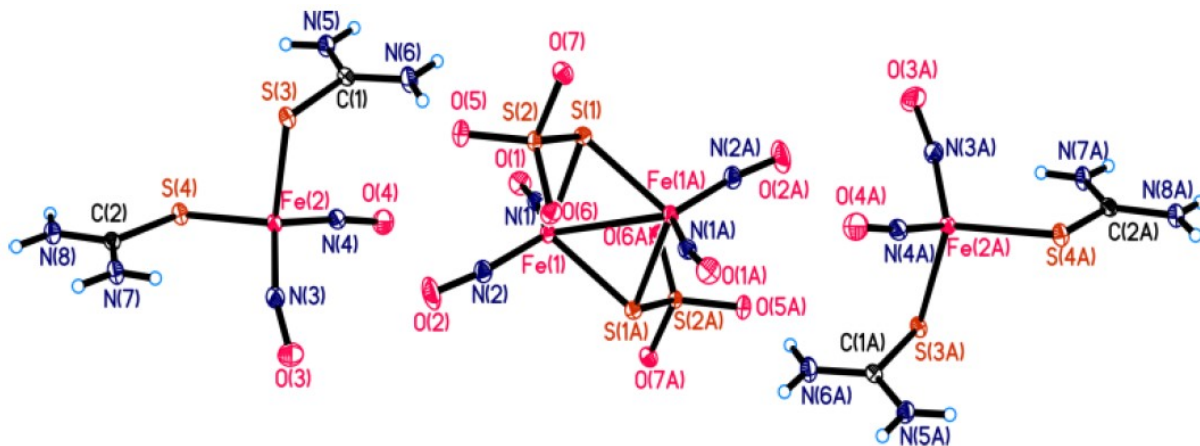

Fig. S1 Molecular structure of complex 1 (according data<sup>31</sup>).

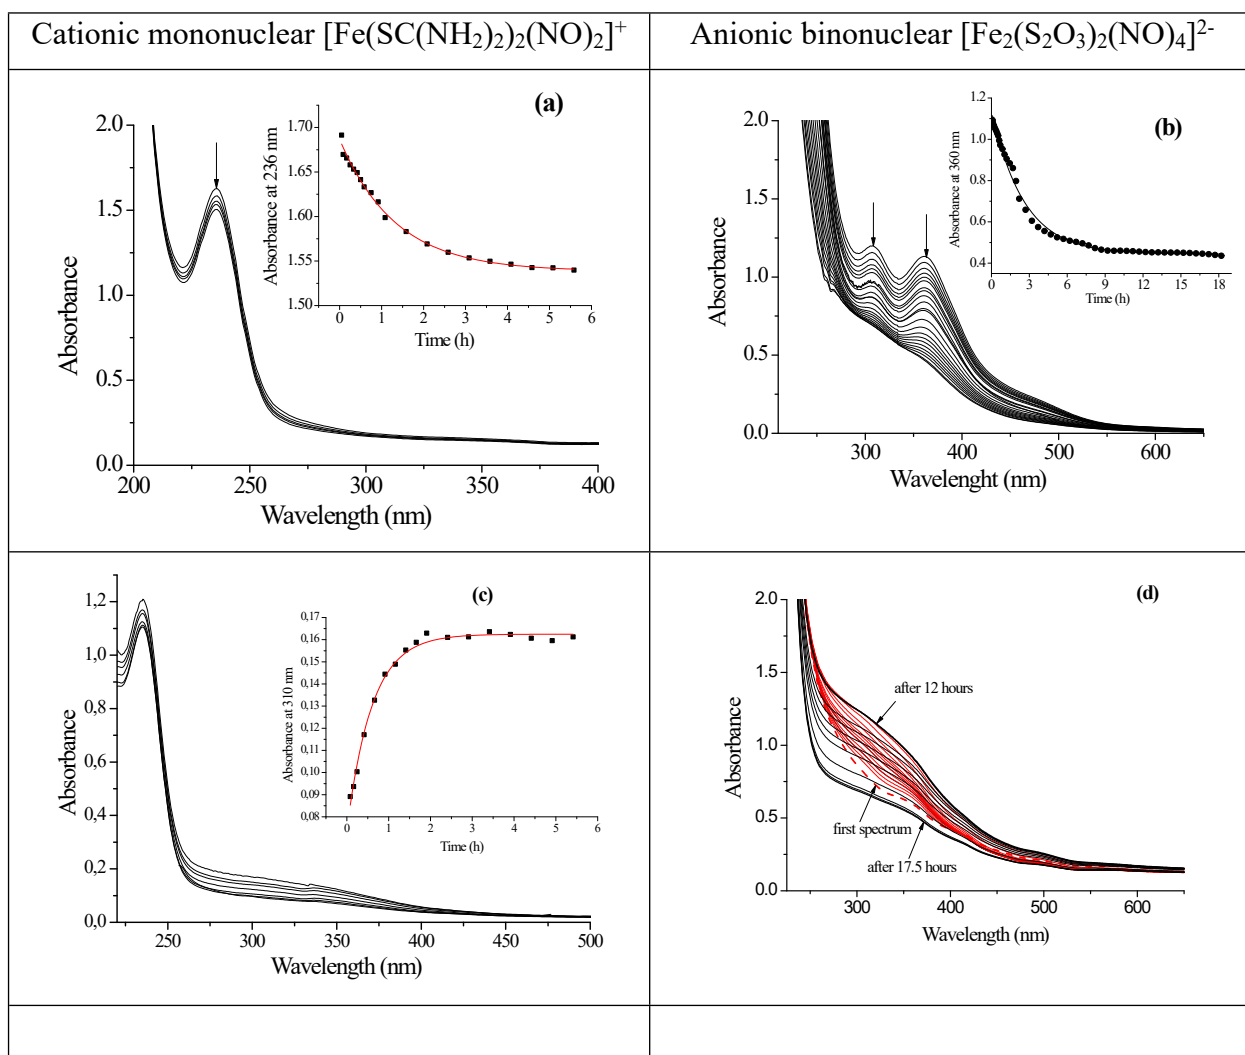

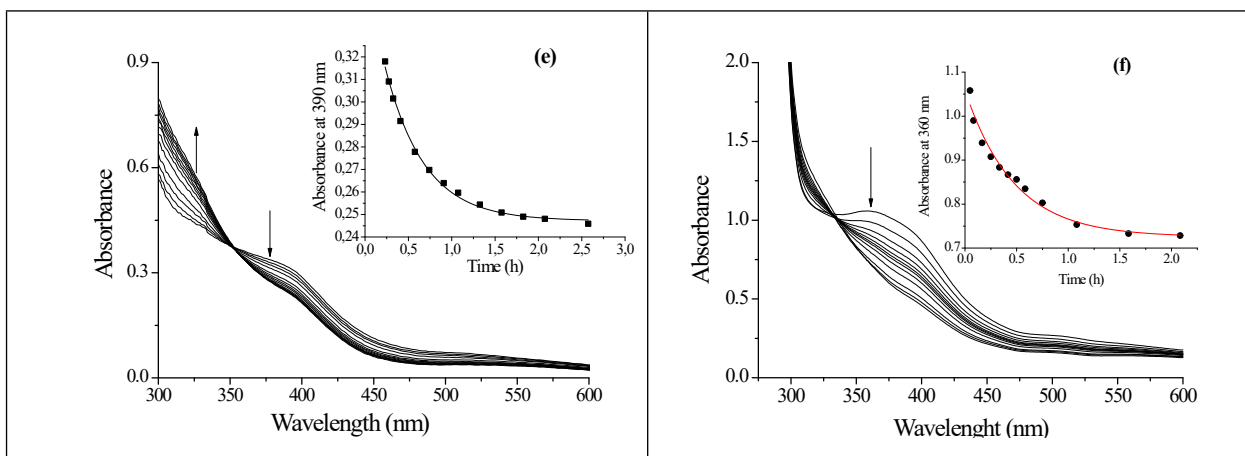

**Fig. S2** Time-dependent change of UV–Vis spectra for cationic (a) and anionic (b) particles of complex 1 under anaerobic conditions. Time-dependent change of UV–Vis spectra for cationic (c) and anionic (d) particles of complex 1 under aerobic conditions. Time-dependent change of UV–Vis spectra for cationic (e) and anionic (f) particles of complex 1 with BSA under aerobic conditions. Conditions: initial concentrations of complexes are  $6.65 \cdot 10^{-5}$  M (a);  $1.8 \cdot 10^{-4}$  M (b);  $4.4 \cdot 10^{-5}$  M (c);  $2 \cdot 10^{-4}$  M (d);  $2.3 \cdot 10^{-4}$  M (e);  $2 \cdot 10^{-4}$  M (f); BSA – 0 M (a, b, c, d);  $2.3 \cdot 10^{-4}$  M (e);  $2 \cdot 10^{-4}$  M (f); solvent - Tris-HCl buffer, pH 7.0, 23 °C.<sup>26,29,35</sup>

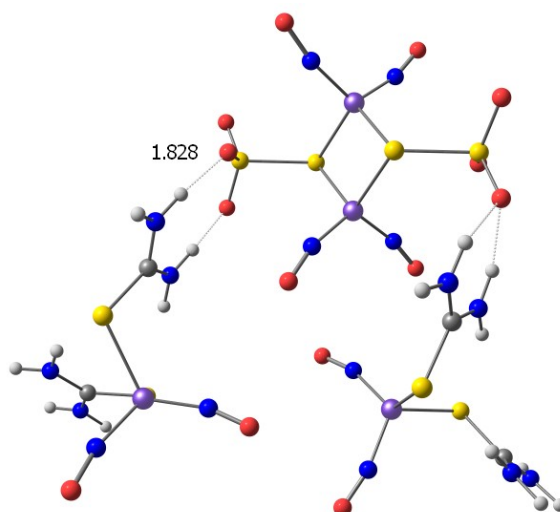

**Fig. S3** Optimized geometry of the complex 1 in solution (scrf=pcm)
